# Supplementary material
Source: PubMed Central journal article supplement (PMC3448798)
Supplement: NIHMS400524-supplement-1_si_001.pdf [file NIHMS400524-supplement-1_si_001.pdf]

Constrained Bonding Environment in the Michaelis Complex of *Trypanosoma cruzi* Uridine Phosphorylase

Rafael G. Silva, D. Randal Kipp and Vern L. Schramm\*

Department of Biochemistry, Albert Einstein College of Medicine of Yeshiva University, 1300 Morris Park Ave, Bronx, NY 10461

Scheme S1. Atom numbering of uridine.

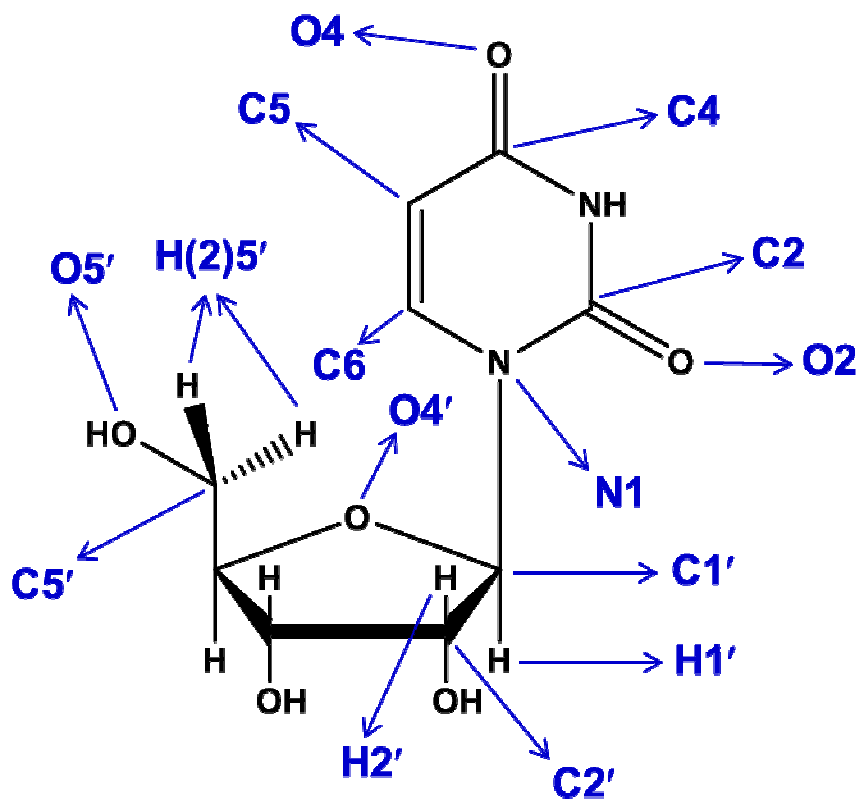

## EXPERIMENTAL PROCEDURES

**Materials.** D-[1-<sup>3</sup>H]Ribose and D-[6-<sup>3</sup>H<sub>2</sub>]Glucose were purchased from American Radiolabeled Chemicals, Inc., and D-[6-<sup>14</sup>C]glucose was from Perkin Elmer, Inc. Pyruvate kinase, myokinase, hexokinase, glucose-6-phosphate dehydrogenase, glutamic acid dehydrogenase, 6-phosphogluconic acid dehydrogenase, and phosphoriboisomerase were from Sigma-Aldrich. Alkaline phosphatase was from Roche. Ribokinase and phosphoribosyl- $\alpha$ -1-pyrophosphate synthetase were prepared as previously described.<sup>1</sup> UMP synthase was kindly provided by Dr. Keith Hazleton of this laboratory. All other chemicals and reagents were obtained from commercial sources and were used without further purification. *Trypanosoma cruzi* uridine phosphorylase was expressed and purified as published.<sup>2</sup>

**Synthesis and purification of radiolabeled uridines.** [1'-<sup>3</sup>H]Uridine, [5'-<sup>3</sup>H<sub>2</sub>]uridine, and [5'-<sup>14</sup>C]uridine were synthesized and purified as previously reported.<sup>2</sup>

**Measurement of 1'-<sup>3</sup>H and 5'-<sup>3</sup>H<sub>2</sub> BIE's.** BIE's were determined by the competitive radiolabel method. Incubation mixtures (100  $\mu$ L) consisted of 20  $\mu$ M TcUP, 50  $\mu$ M uridine ([5'-<sup>14</sup>C]uridine and either [1'-<sup>3</sup>H]uridine or [5'-<sup>3</sup>H<sub>2</sub>]uridine), 50 mM (NH<sub>4</sub>)<sub>2</sub>SO<sub>4</sub> pH 7.5, and 100 mM HEPES pH 7.5. The incubation mixture was loaded onto an ultrafiltration apparatus, and an argon pressure of 30 psi was applied until approximately half the volume had passed through a semi-permeable membrane (10 kDa molecular weight retention), when 30  $\mu$ L were removed from top and bottom wells. The total <sup>3</sup>H signal was assessed by eq 1, and the total <sup>14</sup>C signal by eq 2.<sup>3</sup> Tritium BIE's were calculated with eq 3.<sup>4</sup> In eqs 1–3, <sup>3</sup>H is the total number of cpm for this isotope, <sup>14</sup>C is the total number of cpm for this isotope, channel 1 and channel 2 are the number of cpm in each channel,  $r$  is the channel 1 to channel 2 ratio of <sup>14</sup>C standard, <sup>14</sup>C<sub>T</sub> and <sup>14</sup>C<sub>B</sub> are the total <sup>14</sup>C counts in the top and bottom wells, respectively, and <sup>3</sup>H<sub>T</sub> and <sup>3</sup>H<sub>B</sub> are the total <sup>3</sup>H counts in the top and bottom wells, respectively. BIE values are expressed as averages and their standard errors for at least 10 replicates in 2 independent experiments. The effect of sulfate ion on the 1'-

$^3\text{H}$  BIE was assessed by excluding  $(\text{NH}_4)_2\text{SO}_4$  from the incubation mixture. Controls were performed by the same procedure, except that enzyme was omitted.

$$^3H = \text{channel 1} - (\text{channel 2} \times r) \quad (1)$$

$$^{14}C = \text{channel 2} \times (1 + r) \quad (2)$$

$$\text{BIE} = (^{14}C_T / ^{14}C_B - 1) / (^3H_T / ^3H_B - 1) \quad (3)$$

**Computational methods.** Uridine conformations were optimized in vacuo at the B3LYP level of theory and the 6-31G\*\* basis set, as implemented in Gaussian 09<sup>5</sup>, by varying the O4'-C1'-N1-C6 dihedral angle with either 2'-endo-3'-exo or 2'-exo-3'-endo ribosyl pucker. Isotope effects for each structure were calculated from scaled vibrational frequencies using ISOEFF98.<sup>6</sup>

By testing two opposite ribosyl conformations and varying the O4'-C1'-N1-C6 dihedral angle to search for a theoretical model of enzyme-bound uridine, several possible degrees of freedom of uridine were not explored in this study. It should be pointed out, therefore, that the proposed model of uridine in the Michaelis complex provides a solution whose calculated BIE's best match the experimental ones, but it may not necessarily be a unique solution.

**HPLC analysis.** A reaction mixture (100  $\mu\text{L}$ ) containing 50 mM  $(\text{NH}_4)_2\text{SO}_4$  pH 7.5, 10  $\mu\text{M}$  TcUP, 100  $\mu\text{M}$  uridine, and 100 mM HEPES pH 7.5 was allowed to proceed for 90 min. Standards contained either 100  $\mu\text{M}$  uridine or 100  $\mu\text{M}$  uracil, and 50 mM  $(\text{NH}_4)_2\text{SO}_4$  pH 7.5 and 100 mM HEPES pH 7.5. Each sample was injected and run at 1.0 mL  $\text{min}^{-1}$  in an HPLC C<sub>18</sub> Delta Pak column (Waters) pre-equilibrated with 10 column volumes of 50 mM of triethylamine:acetic acid pH 5.0, and base and nucleoside elution were followed by monitoring the increase in absorbance at 262 nm.

## RESULTS

Table S1. Calculated BIE's for DFT-optimized uridine conformations.

| <b>O4'-C1'-N1-<br/>C6 Dihedral<br/>Angle (°)<br/>(2'-endo-3'-<br/>exo sugar<br/>pucker)</b> | <b>1'-<sup>3</sup>H BIE</b> | <b>5'-<sup>3</sup>H<sub>2</sub> BIE</b> | <b>O4'-C1'-N1-<br/>C6 Dihedral<br/>Angle (°)<br/>(2'-exo-3'-<br/>endo sugar<br/>pucker)</b> | <b>1'-<sup>3</sup>H BIE</b> | <b>5'-<sup>3</sup>H<sub>2</sub> BIE</b> |
|---------------------------------------------------------------------------------------------|-----------------------------|-----------------------------------------|---------------------------------------------------------------------------------------------|-----------------------------|-----------------------------------------|
| <b>-180.0000</b>                                                                            | 1.0450                      | 0.9853                                  | <b>-180.0000</b>                                                                            | 1.0196                      | 0.9802                                  |
| <b>-160.0000</b>                                                                            | 1.0288                      | 0.9954                                  | <b>-140.0000</b>                                                                            | 1.0052                      | 0.9890                                  |
| <b>-140.0000</b>                                                                            | 1.0246                      | 0.9970                                  | <b>-120.0000</b>                                                                            | 0.9706                      | 0.9793                                  |
| <b>-120.0000</b>                                                                            | 1.0019                      | 1.0001                                  | <b>-100.0000</b>                                                                            | 0.9611                      | 0.9826                                  |
| <b>-100.0000</b>                                                                            | 0.9912                      | 0.9986                                  | <b>-75.0000</b>                                                                             | 0.9487                      | 0.9720                                  |
| <b>-80.0000</b>                                                                             | 0.9814                      | 0.9937                                  | <b>-50.0000</b>                                                                             | 0.9624                      | 0.9689                                  |
| <b>-60.0000</b>                                                                             | 0.9634                      | 0.9933                                  | <b>-30.0000</b>                                                                             | 1.0220                      | 0.9543                                  |
| <b>-40.0000</b>                                                                             | 1.0248                      | 0.9693                                  | <b>-20.0000</b>                                                                             | 1.0166                      | 0.9571                                  |
| <b>-20.0000</b>                                                                             | 1.0232                      | 0.9737                                  | <b>0.0000</b>                                                                               | 0.9957                      | 0.9499                                  |
| <b>0.0000</b>                                                                               | 1.0050                      | 0.9767                                  | <b>20.0000</b>                                                                              | 0.9617                      | 0.9367                                  |
| <b>20.0000</b>                                                                              | 0.9806                      | 0.9558                                  | <b>40.0000</b>                                                                              | 0.9290                      | 0.9438                                  |
| <b>40.0000</b>                                                                              | 0.9486                      | 1.0150                                  | <b>47.0000</b>                                                                              | 0.9360                      | 0.9433                                  |
| <b>65.0000</b>                                                                              | 0.9190                      | 1.0067                                  | <b>60.0000</b>                                                                              | 0.9082                      | 0.9487                                  |
| <b>80.0000</b>                                                                              | 0.9112                      | 1.0050                                  | <b>80.0000</b>                                                                              | 0.9072                      | 0.9551                                  |
| <b>90.0000</b>                                                                              | 0.9106                      | 1.0097                                  | <b>100.0000</b>                                                                             | 0.9136                      | 0.9601                                  |
| <b>120.0000</b>                                                                             | 0.9906                      | 1.0204                                  | <b>120.0000</b>                                                                             | 0.9445                      | 0.9582                                  |
| <b>140.0000</b>                                                                             | 1.0528                      | 1.0218                                  | <b>145.0000</b>                                                                             | 0.9901                      | 0.9868                                  |
| <b>150.0000</b>                                                                             | 1.0660                      | 1.0195                                  | <b>170.0000</b>                                                                             | 1.0173                      | 0.9811                                  |
| <b>180.0000</b>                                                                             | 1.0450                      | 0.9853                                  | <b>180.0000</b>                                                                             | 1.0196                      | 0.9802                                  |

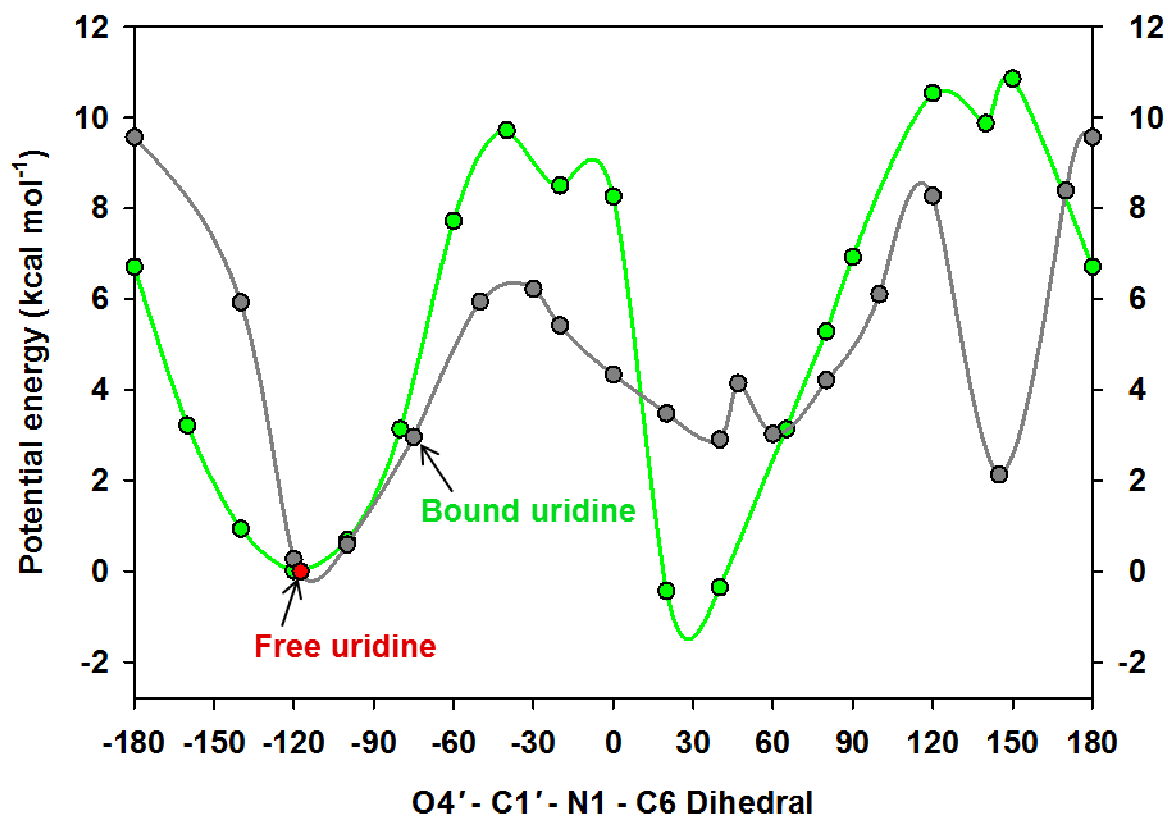

**Figure S1.** Potential energy dependence on O4'-C1'-N1-C6 dihedral angles of 2'-endo-3'-exo (green) and 2'-exo-3'-endo (gray) optimized uridine conformers. The red circle denotes the potential energy of optimized free uridine.

Caution should be exercised when analyzing the potential energy data presented in Figure S1. As described under Experimental Procedures, these are energies were derived from calculations performed *in vacuo*, in the absence of any implicit or explicit models of solvent or of enzyme active site. While they serve a comparative purpose, since all structures were treated in the same manner, the energies obtained here are in no way intended to represent the actual potential energies of the free substrate and the Michaelis complex as found in solution.

## Atomic coordinates of optimized uridine

### 2'-endo-3'-exo ribosyl pucker

O4'-C1'-N1-C6 dihedral =  $-180^\circ$

|   |             |             |             |
|---|-------------|-------------|-------------|
| C | -1.31875500 | -1.05129400 | 0.53356800  |
| C | -0.60573800 | -0.53818000 | -0.75544800 |
| O | -1.28083600 | 0.61305500  | -1.15146500 |
| C | -2.51314500 | 0.80146800  | -0.42005000 |
| C | -2.73975500 | -0.50473700 | 0.35202200  |
| N | 0.85674500  | -0.30246900 | -0.51067100 |
| C | 1.45458100  | 0.95615300  | -0.37613200 |
| N | 2.82411100  | 0.90000900  | -0.18065600 |
| C | 3.63377000  | -0.20992400 | 0.13929400  |
| C | 2.87028300  | -1.44532300 | 0.19110800  |
| C | 1.55628700  | -1.43580000 | -0.11370300 |
| O | 0.87851500  | 2.03804500  | -0.42169500 |
| O | 4.82575500  | -0.06823000 | 0.35486000  |
| C | -2.38473700 | 2.06161900  | 0.43853900  |
| O | -1.30737700 | 1.98083700  | 1.34564100  |
| O | -3.42079900 | -1.48776100 | -0.43550100 |
| O | -1.26282000 | -2.44589600 | 0.70977000  |
| H | -0.85821700 | -0.56600000 | 1.39738000  |
| H | -3.31449800 | 0.94057300  | -1.15784100 |
| H | -2.28365600 | 2.92424500  | -0.23485700 |
| H | -3.30748100 | 2.20059200  | 1.01666300  |
| H | -4.37024500 | -1.31968100 | -0.40481000 |
| H | -0.64352900 | -1.30558900 | -1.54141700 |
| H | -2.01745800 | -2.80045300 | 0.21012600  |
| H | -3.24617000 | -0.34560600 | 1.31048700  |
| H | 3.26967200  | 1.80796900  | -0.11862000 |
| H | 3.37466300  | -2.35652800 | 0.48117400  |
| H | 0.95533900  | -2.33783900 | -0.08129800 |
| H | -0.50065600 | 2.13123400  | 0.81424100  |

O4'-C1'-N1-C6 dihedral =  $-160^\circ$

|   |             |             |             |
|---|-------------|-------------|-------------|
| C | -1.22973100 | -0.93691700 | 0.67415400  |
| C | -0.52273500 | -0.60995700 | -0.66504700 |
| O | -1.21669700 | 0.46646200  | -1.22325600 |
| C | -2.54892500 | 0.56917600  | -0.66068700 |
| C | -2.68701500 | -0.59786000 | 0.33384800  |
| N | 0.92134900  | -0.30758800 | -0.50579800 |
| C | 1.39176500  | 0.95680400  | -0.12494500 |
| N | 2.76416400  | 1.01783200  | 0.02612900  |

|   |             |             |             |
|---|-------------|-------------|-------------|
| C | 3.69908400  | -0.03859500 | 0.08192200  |
| C | 3.07387300  | -1.33582600 | -0.11536800 |
| C | 1.75344200  | -1.41143900 | -0.37799800 |
| O | 0.69798600  | 1.94988700  | 0.05653000  |
| O | 4.87824800  | 0.18784800  | 0.29316000  |
| C | -2.70696200 | 1.95261800  | -0.03297000 |
| O | -1.88902000 | 2.12504900  | 1.10208300  |
| O | -3.21250200 | -1.78093500 | -0.28041900 |
| O | -1.02181600 | -2.25546600 | 1.11195400  |
| H | -0.87314500 | -0.24506300 | 1.44114200  |
| H | -3.26979100 | 0.44697600  | -1.48061900 |
| H | -2.50537800 | 2.70700500  | -0.80776600 |
| H | -3.74938900 | 2.07881300  | 0.28673400  |
| H | -4.17546300 | -1.72756100 | -0.29988400 |
| H | -0.55686600 | -1.49223100 | -1.32075000 |
| H | -1.72020300 | -2.78067200 | 0.68653100  |
| H | -3.26472900 | -0.32065900 | 1.22154500  |
| H | 3.11801000  | 1.93827600  | 0.25921900  |
| H | 3.68654900  | -2.22347600 | -0.04338400 |
| H | 1.25421100  | -2.36208700 | -0.52087100 |
| H | -0.96875600 | 2.17818900  | 0.77791500  |

O4'-C1'-N1-C6 dihedral = -140°

|   |             |             |             |
|---|-------------|-------------|-------------|
| C | -1.22976500 | -0.84597600 | 0.77074000  |
| C | -0.48013500 | -0.66907000 | -0.57011200 |
| O | -1.15297000 | 0.34535900  | -1.26788300 |
| C | -2.52308100 | 0.45030800  | -0.80272400 |
| C | -2.67880200 | -0.58508200 | 0.32933300  |
| N | 0.95114100  | -0.34541200 | -0.43698800 |
| C | 1.36280700  | 0.88738100  | 0.08488200  |
| N | 2.72997500  | 1.01834000  | 0.21311400  |
| C | 3.73590700  | 0.04250200  | 0.03524800  |
| C | 3.19333000  | -1.23808000 | -0.38708400 |
| C | 1.86695400  | -1.37302000 | -0.59064200 |
| O | 0.60619200  | 1.79442000  | 0.40866500  |
| O | 4.90593500  | 0.31638200  | 0.23928400  |
| C | -2.78526300 | 1.88993400  | -0.36662800 |
| O | -2.13582700 | 2.22112800  | 0.83953300  |
| O | -3.15956400 | -1.84785000 | -0.14999100 |
| O | -1.01619900 | -2.09899100 | 1.36596500  |
| H | -0.91826600 | -0.06240600 | 1.46399100  |
| H | -3.18457700 | 0.18682300  | -1.63950100 |
| H | -2.49935000 | 2.55767900  | -1.19356200 |
| H | -3.86281200 | 2.01520600  | -0.20068600 |
| H | -4.12360800 | -1.83066800 | -0.17381000 |
| H | -0.51045400 | -1.62096000 | -1.11892800 |
| H | -1.69196000 | -2.68356400 | 0.98392800  |



|   |             |             |             |
|---|-------------|-------------|-------------|
| H | -3.29718400 | -0.20887000 | 1.14981200  |
| H | 3.03645700  | 1.91685000  | 0.56741800  |
| H | 3.87356400  | -2.06533500 | -0.53314800 |
| H | 1.43375200  | -2.31344800 | -0.90954800 |
| H | -1.17563300 | 2.20124000  | 0.66849900  |

O4'-C1'-N1-C6 dihedral = -120°

|   |             |             |             |
|---|-------------|-------------|-------------|
| C | -1.30781000 | -0.78136600 | 0.84016200  |
| C | -0.46878000 | -0.72643600 | -0.45823000 |
| O | -1.06878600 | 0.24004000  | -1.28733700 |
| C | -2.45662300 | 0.43226200  | -0.90991500 |
| C | -2.71605000 | -0.51181400 | 0.28023300  |
| N | 0.95906100  | -0.42336500 | -0.29114700 |
| C | 1.36430300  | 0.78942600  | 0.27546600  |
| N | 2.73007700  | 0.94639400  | 0.36707000  |
| C | 3.75519100  | 0.05220300  | -0.01554300 |
| C | 3.23102400  | -1.17714800 | -0.58770300 |
| C | 1.89851300  | -1.35309000 | -0.70107300 |
| O | 0.59440100  | 1.65530200  | 0.67490100  |
| O | 4.92600100  | 0.34986200  | 0.14491100  |
| C | -2.69003600 | 1.90830100  | -0.59220600 |
| O | -2.14768400 | 2.30021300  | 0.64852000  |
| O | -3.20624000 | -1.79184600 | -0.14154900 |
| O | -1.18336100 | -1.99664100 | 1.53100700  |
| H | -1.01792500 | 0.03563500  | 1.50097200  |
| H | -3.08022100 | 0.13364700  | -1.76361700 |
| H | -2.29774100 | 2.50536800  | -1.42981300 |
| H | -3.77142000 | 2.08732300  | -0.54004500 |
| H | -4.16667900 | -1.75172000 | -0.21951000 |
| H | -0.49796800 | -1.72205900 | -0.92209400 |
| H | -1.85058000 | -2.58498400 | 1.14012200  |
| H | -3.37411900 | -0.06028200 | 1.02848000  |
| H | 3.03008800  | 1.82264700  | 0.77810800  |
| H | 3.93025500  | -1.93154200 | -0.91998800 |
| H | 1.47781000  | -2.25524300 | -1.12912800 |
| H | -1.17850700 | 2.21054000  | 0.59428800  |

O4'-C1'-N1-C6 dihedral = -100°

|   |             |             |             |
|---|-------------|-------------|-------------|
| C | -1.40242000 | -0.71702100 | 0.89101100  |
| C | -0.47629900 | -0.77662200 | -0.34696500 |
| O | -0.98350100 | 0.13458000  | -1.29736000 |
| C | -2.36992200 | 0.44705400  | -1.00245200 |
| C | -2.75426000 | -0.41652700 | 0.21309000  |

|   |             |             |             |
|---|-------------|-------------|-------------|
| N | 0.95341200  | -0.51828200 | -0.13631500 |
| C | 1.37382400  | 0.67633700  | 0.45924800  |
| N | 2.74031700  | 0.84010600  | 0.50854900  |
| C | 3.75027200  | 0.03413500  | -0.06405300 |
| C | 3.20628900  | -1.11943900 | -0.76225800 |
| C | 1.87435900  | -1.32854600 | -0.78140300 |
| O | 0.61284600  | 1.51821800  | 0.92360100  |
| O | 4.92374000  | 0.34283600  | 0.04649800  |
| C | -2.51730600 | 1.95048800  | -0.76678000 |
| O | -2.05368500 | 2.37023300  | 0.49718200  |
| O | -3.27337300 | -1.69479900 | -0.17879900 |
| O | -1.39126600 | -1.90069700 | 1.64532200  |
| H | -1.12363400 | 0.11493300  | 1.53489300  |
| H | -2.96819000 | 0.15202300  | -1.87494700 |
| H | -2.01684800 | 2.47614100  | -1.59466000 |
| H | -3.58321300 | 2.20673500  | -0.81308700 |
| H | -4.22467500 | -1.61946900 | -0.31810900 |
| H | -0.51931000 | -1.80484200 | -0.73206800 |
| H | -2.05075200 | -2.47968400 | 1.22827100  |
| H | -3.44099300 | 0.10254600  | 0.88802600  |
| H | 3.05029500  | 1.69052400  | 0.96418900  |
| H | 3.89060800  | -1.78928800 | -1.26380900 |
| H | 1.43863500  | -2.17702000 | -1.29589400 |
| H | -1.09334700 | 2.21249400  | 0.54336900  |

O4'-C1'-N1-C6 dihedral = -80°

|   |             |             |             |
|---|-------------|-------------|-------------|
| C | -1.49466800 | -0.64719300 | 0.92235400  |
| C | -0.50009400 | -0.82419000 | -0.25019700 |
| O | -0.91614100 | 0.01058300  | -1.31251300 |
| C | -2.27133700 | 0.47806700  | -1.08263400 |
| C | -2.78158100 | -0.29879000 | 0.14270900  |
| N | 0.93623900  | -0.61722700 | -0.01174800 |
| C | 1.38521800  | 0.54076000  | 0.63963600  |
| N | 2.75365600  | 0.69553200  | 0.65215000  |
| C | 3.72368800  | -0.00043100 | -0.10446400 |
| C | 3.13257900  | -1.03762500 | -0.93521700 |
| C | 1.80745800  | -1.27462300 | -0.87290500 |
| O | 0.64735800  | 1.35655300  | 1.18226700  |
| O | 4.90023900  | 0.30719100  | -0.03443400 |
| C | -2.28318100 | 1.99820800  | -0.90237600 |
| O | -1.88121900 | 2.42736000  | 0.38074000  |
| O | -3.35626400 | -1.55923400 | -0.22688100 |
| O | -1.61039600 | -1.79684900 | 1.71968800  |
| H | -1.21026300 | 0.18869000  | 1.55539200  |
| H | -2.86019500 | 0.21391300  | -1.97061000 |
| H | -1.67319000 | 2.44037700  | -1.70504600 |
| H | -3.31173300 | 2.35451700  | -1.03934400 |

|   |             |             |             |
|---|-------------|-------------|-------------|
| H | -4.29330900 | -1.43458700 | -0.41757500 |
| H | -0.56862000 | -1.87856400 | -0.55368700 |
| H | -2.26868100 | -2.35638700 | 1.27501700  |
| H | -3.47315800 | 0.29244700  | 0.74995600  |
| H | 3.08429200  | 1.50295000  | 1.16783200  |
| H | 3.77681200  | -1.59807000 | -1.59818700 |
| H | 1.33723200  | -2.04052300 | -1.47874200 |
| H | -0.94555200 | 2.19717400  | 0.51979900  |

O4'-C1'-N1-C6 dihedral =  $-60^\circ$

|   |             |             |             |
|---|-------------|-------------|-------------|
| C | -1.57687700 | -0.57224700 | 0.92922200  |
| C | -0.54723900 | -0.86908000 | -0.19232200 |
| O | -0.91887400 | -0.15590600 | -1.35756300 |
| C | -2.18079900 | 0.52759400  | -1.14352000 |
| C | -2.80274700 | -0.15325200 | 0.08401400  |
| N | 0.90436000  | -0.68956100 | 0.03612200  |
| C | 1.39915100  | 0.37242200  | 0.81026000  |
| N | 2.77202900  | 0.49656900  | 0.79515500  |
| C | 3.68548700  | -0.04753700 | -0.13648300 |
| C | 3.02660200  | -0.89764000 | -1.11568700 |
| C | 1.70752000  | -1.14781100 | -1.00759800 |
| O | 0.70132100  | 1.13533000  | 1.47094200  |
| O | 4.86918400  | 0.23405000  | -0.08078100 |
| C | -1.98010200 | 2.04055200  | -0.97943800 |
| O | -1.63254000 | 2.45506000  | 0.32687700  |
| O | -3.46616700 | -1.37345700 | -0.26705700 |
| O | -1.81744100 | -1.68574500 | 1.74987700  |
| H | -1.26170300 | 0.25387600  | 1.55686600  |
| H | -2.78849400 | 0.34462800  | -2.03802700 |
| H | -1.24963300 | 2.36848600  | -1.73439000 |
| H | -2.93114800 | 2.53700200  | -1.20754000 |
| H | -4.38854400 | -1.18272200 | -0.47354200 |
| H | -0.63537000 | -1.94457800 | -0.40004400 |
| H | -2.49029100 | -2.21101700 | 1.28538000  |
| H | -3.46339200 | 0.51528200  | 0.64375500  |
| H | 3.13747100  | 1.21709400  | 1.40718700  |
| H | 3.61609400  | -1.30988000 | -1.92274800 |
| H | 1.18852500  | -1.77856100 | -1.71979400 |
| H | -0.73807200 | 2.14867800  | 0.55491900  |

O4'-C1'-N1-C6 dihedral =  $-40^\circ$

|   |            |            |             |
|---|------------|------------|-------------|
| C | 1.57224200 | 1.03376200 | 0.21223900  |
| C | 0.62827300 | 0.35839100 | -0.83324600 |

|   |             |             |             |
|---|-------------|-------------|-------------|
| O | 1.20461400  | -0.87690600 | -1.18039100 |
| C | 2.23866600  | -1.26659300 | -0.24300900 |
| C | 2.77126600  | 0.04279300  | 0.32953200  |
| N | -0.77435200 | 0.09018200  | -0.34628300 |
| C | -1.47391700 | 1.09858800  | 0.35405600  |
| N | -2.81715900 | 0.81957100  | 0.54690400  |
| C | -3.60663900 | -0.18332900 | -0.05146300 |
| C | -2.82765400 | -1.05678000 | -0.91729800 |
| C | -1.49781200 | -0.87412400 | -1.04517700 |
| O | -0.95539500 | 2.11320600  | 0.78218900  |
| O | -4.80481100 | -0.24505100 | 0.16519000  |
| C | 1.70103300  | -2.22829900 | 0.81407800  |
| O | 0.84375900  | -1.60345000 | 1.75759900  |
| O | 3.86461800  | 0.47639300  | -0.48346700 |
| O | 1.99345900  | 2.31298700  | -0.18973400 |
| H | 1.06997200  | 1.13890900  | 1.16922100  |
| H | 3.01258000  | -1.76727900 | -0.83315500 |
| H | 1.21055400  | -3.07368600 | 0.31041400  |
| H | 2.54646600  | -2.62901200 | 1.38428900  |
| H | 4.34810000  | 1.14592200  | 0.01907300  |
| H | 0.55125600  | 0.98137800  | -1.73071600 |
| H | 2.64596100  | 2.16137600  | -0.89266200 |
| H | 3.08392600  | -0.07034300 | 1.37223800  |
| H | -3.31521900 | 1.51549000  | 1.08963000  |
| H | -3.34291100 | -1.83988500 | -1.45632700 |
| H | -0.88538300 | -1.50486500 | -1.67630900 |
| H | 0.01257600  | -1.39018900 | 1.31059100  |

O4'-C1'-N1-C6 dihedral = -20°

|   |             |             |             |
|---|-------------|-------------|-------------|
| C | 1.54518000  | 1.02907300  | 0.31641600  |
| C | 0.65524800  | 0.47879000  | -0.84224900 |
| O | 1.23739300  | -0.71554500 | -1.29420200 |
| C | 2.19355000  | -1.24046400 | -0.33904900 |
| C | 2.68284300  | -0.03514800 | 0.46119600  |
| N | -0.76421200 | 0.19849200  | -0.43257700 |
| C | -1.49455400 | 1.24827100  | 0.14659100  |
| N | -2.81635400 | 0.93456100  | 0.41620500  |
| C | -3.53864700 | -0.22167100 | 0.05568700  |
| C | -2.72057500 | -1.18457900 | -0.66814800 |
| C | -1.41352400 | -0.92848000 | -0.90138100 |
| O | -1.00460300 | 2.33389100  | 0.40335500  |
| O | -4.72042700 | -0.33109500 | 0.33707600  |
| C | 1.59530200  | -2.34223900 | 0.53494500  |
| O | 0.70560300  | -1.85148400 | 1.52824300  |
| O | 3.89289300  | 0.43320900  | -0.13754700 |
| O | 2.07017700  | 2.30267500  | 0.04113500  |
| H | 0.96688000  | 1.10366700  | 1.23523000  |

|   |             |             |             |
|---|-------------|-------------|-------------|
| H | 3.01449300  | -1.65742000 | -0.93090400 |
| H | 1.12142400  | -3.09865700 | -0.10555000 |
| H | 2.41684000  | -2.83436200 | 1.06846500  |
| H | 4.29752400  | 1.05479900  | 0.48324000  |
| H | 0.62295100  | 1.20117600  | -1.66385400 |
| H | 2.78765200  | 2.15670300  | -0.59655500 |
| H | 2.84531800  | -0.29156200 | 1.51246500  |
| H | -3.34587900 | 1.67379200  | 0.86311700  |
| H | -3.19205700 | -2.08598100 | -1.03473500 |
| H | -0.77798200 | -1.60262600 | -1.46083800 |
| H | -0.17042000 | -1.74543400 | 1.13600300  |

O4'-C1'-N1-C6 dihedral = 0°

|   |             |             |             |
|---|-------------|-------------|-------------|
| C | -1.47993200 | 0.96999600  | -0.45740600 |
| C | -0.65518200 | 0.53813500  | 0.79748700  |
| O | -1.25606400 | -0.61095800 | 1.33383500  |
| C | -2.24578400 | -1.17068100 | 0.43308000  |
| C | -2.68625800 | -0.01957700 | -0.46674800 |
| N | 0.78186300  | 0.23885800  | 0.49797300  |
| C | 1.56312300  | 1.30167700  | 0.02858800  |
| N | 2.86900500  | 0.95176800  | -0.27309100 |
| C | 3.50254600  | -0.29905600 | -0.12190500 |
| C | 2.61871300  | -1.30665400 | 0.44822500  |
| C | 1.33470400  | -0.99611800 | 0.74404700  |
| O | 1.12138600  | 2.42911200  | -0.10607900 |
| O | 4.67158000  | -0.44766700 | -0.43790300 |
| C | -1.70958100 | -2.36883000 | -0.34966300 |
| O | -0.80637000 | -1.99279600 | -1.38321900 |
| O | -3.83617500 | 0.58805500  | 0.12013500  |
| O | -1.91427800 | 2.30522700  | -0.42190300 |
| H | -0.87827200 | 0.84710400  | -1.35811300 |
| H | -3.07982700 | -1.49834100 | 1.06186300  |
| H | -1.26304100 | -3.09115600 | 0.34624800  |
| H | -2.56124800 | -2.86589000 | -0.83034000 |
| H | -4.18246200 | 1.21819500  | -0.52712700 |
| H | -0.65949400 | 1.34147600  | 1.54083700  |
| H | -2.55370800 | 2.36037600  | 0.30504400  |
| H | -2.90366800 | -0.36312700 | -1.48353400 |
| H | 3.44290700  | 1.70692600  | -0.62903300 |
| H | 3.02723600  | -2.28440300 | 0.66359800  |
| H | 0.66065200  | -1.69405400 | 1.22327400  |
| H | 0.10011700  | -2.07263200 | -1.06003300 |

O4'-C1'-N1-C6 dihedral = 20°

|   |             |             |             |
|---|-------------|-------------|-------------|
| C | 1.26234200  | 0.82708200  | 0.68944700  |
| C | 0.50499700  | 0.39098700  | -0.57930100 |
| O | 1.18559500  | -0.73858700 | -1.06901600 |
| C | 2.58801600  | -0.67306600 | -0.66524000 |
| C | 2.71612600  | 0.55153500  | 0.25617600  |
| N | -0.91799100 | 0.02706300  | -0.38430500 |
| C | -1.79694900 | 1.08539300  | -0.17662700 |
| N | -3.10923900 | 0.71925500  | -0.01000700 |
| C | -3.64431900 | -0.58937800 | 0.09809700  |
| C | -2.62783400 | -1.62011900 | -0.04071600 |
| C | -1.33947600 | -1.28145600 | -0.26709200 |
| O | -1.42123600 | 2.25798300  | -0.14217400 |
| O | -4.83591800 | -0.75015700 | 0.29225900  |
| C | 2.96779900  | -2.00208100 | -0.02735800 |
| O | 2.30659500  | -2.23307800 | 1.20943300  |
| O | 3.19424200  | 1.64279600  | -0.50611500 |
| O | 1.11610400  | 2.18817500  | 1.02166900  |
| H | 0.98802400  | 0.16448700  | 1.52241400  |
| H | 3.19371700  | -0.50537200 | -1.56298300 |
| H | 2.78071100  | -2.81440000 | -0.74426800 |
| H | 4.04052600  | -1.99296800 | 0.19083100  |
| H | 2.79558900  | 2.42860100  | -0.09263000 |
| H | 0.51566300  | 1.21360100  | -1.30432700 |
| H | 0.23616300  | 2.47802700  | 0.71213200  |
| H | 3.36337900  | 0.34419300  | 1.11874100  |
| H | -3.75915700 | 1.48334400  | 0.13432700  |
| H | -2.93519100 | -2.65439000 | 0.02695900  |
| H | -0.55816500 | -2.01190600 | -0.42472500 |
| H | 1.38209100  | -2.42787600 | 1.01095000  |

O4'-C1'-N1-C6 dihedral = 40°

|   |             |             |             |
|---|-------------|-------------|-------------|
| C | -1.26821200 | -0.77549500 | 0.74327900  |
| C | -0.54040600 | -0.49078700 | -0.58021200 |
| O | -1.24034300 | 0.53145200  | -1.24499600 |
| C | -2.56400500 | 0.68022300  | -0.67317900 |
| C | -2.72365900 | -0.44664400 | 0.36466900  |
| N | 0.87101900  | -0.09061200 | -0.42600800 |
| C | 1.78223400  | -1.13442100 | -0.27942000 |
| N | 3.08732000  | -0.73096200 | -0.13271200 |
| C | 3.56591500  | 0.58332700  | 0.10396600  |
| C | 2.49951100  | 1.57154300  | 0.13774000  |
| C | 1.22078100  | 1.20660700  | -0.10344300 |
| O | 1.43728000  | -2.31629300 | -0.27401600 |
| O | 4.75668500  | 0.77691200  | 0.27884400  |
| C | -2.72437100 | 2.09324300  | -0.13784000 |
| O | -1.80783000 | 2.28496800  | 0.93743300  |
| O | -3.31358100 | -1.56251700 | -0.27190300 |

|   |             |             |             |
|---|-------------|-------------|-------------|
| O | -1.15777000 | -2.12584900 | 1.15271500  |
| H | -0.91625600 | -0.08560300 | 1.52021000  |
| H | -3.29795800 | 0.52387000  | -1.47145500 |
| H | -2.53263500 | 2.80297400  | -0.95513400 |
| H | -3.76581400 | 2.22517000  | 0.19210300  |
| H | -2.90661200 | -2.33788000 | 0.15284000  |
| H | -0.52106100 | -1.40367400 | -1.18415400 |
| H | -0.31493100 | -2.47538400 | 0.81017800  |
| H | -3.31205600 | -0.11946900 | 1.23330900  |
| H | 3.76868200  | -1.47625400 | -0.04994400 |
| H | 2.76110900  | 2.59533400  | 0.36643000  |
| H | 0.38660900  | 1.89735900  | -0.08161700 |
| H | -1.93970100 | 3.16962300  | 1.30029200  |

O4'-C1'-N1-C6 dihedral = 65°

|   |             |             |             |
|---|-------------|-------------|-------------|
| C | -1.36522300 | -0.57285800 | 0.94330300  |
| C | -0.52116200 | -0.62561200 | -0.34451100 |
| O | -1.16367000 | 0.21541900  | -1.28901600 |
| C | -2.51125300 | 0.51048500  | -0.86478000 |
| C | -2.77692400 | -0.36069400 | 0.37466200  |
| N | 0.87222300  | -0.20591200 | -0.20378500 |
| C | 1.88209500  | -1.12805800 | -0.52933400 |
| N | 3.16109400  | -0.64290000 | -0.33470100 |
| C | 3.56376300  | 0.60367200  | 0.19212300  |
| C | 2.43814800  | 1.46358700  | 0.52656200  |
| C | 1.17358400  | 1.03857000  | 0.32100700  |
| O | 1.65669700  | -2.25824300 | -0.93056500 |
| O | 4.74819200  | 0.86341100  | 0.32500800  |
| C | -2.66677000 | 2.00787700  | -0.64642300 |
| O | -1.91427700 | 2.39819200  | 0.50352900  |
| O | -3.31856400 | -1.59307300 | -0.06063400 |
| O | -1.34644100 | -1.78008700 | 1.68844900  |
| H | -1.08444600 | 0.28325600  | 1.56622500  |
| H | -3.19833900 | 0.20384300  | -1.66167000 |
| H | -2.31429000 | 2.52814400  | -1.54740200 |
| H | -3.73506300 | 2.23493300  | -0.51219700 |
| H | -3.00881600 | -2.25858800 | 0.57489200  |
| H | -0.47922000 | -1.65480000 | -0.71044500 |
| H | -0.43667600 | -2.09738800 | 1.76181800  |
| H | -3.43788700 | 0.13833500  | 1.09667200  |
| H | 3.90419300  | -1.28956700 | -0.57067100 |
| H | 2.64679200  | 2.44629400  | 0.92638000  |
| H | 0.30801000  | 1.66577400  | 0.50798600  |
| H | -1.99050800 | 3.35468400  | 0.60800100  |

O4'-C1'-N1-C6 dihedral = 80°

|   |             |             |             |
|---|-------------|-------------|-------------|
| C | -1.39767400 | -0.46926700 | 1.00765600  |
| C | -0.52949900 | -0.64248100 | -0.25451500 |
| O | -1.17306600 | 0.06156500  | -1.30674900 |
| C | -2.50546500 | 0.44305800  | -0.91264900 |
| C | -2.79807900 | -0.31052200 | 0.39440100  |
| N | 0.86350700  | -0.20397800 | -0.15488800 |
| C | 1.85616300  | -1.08143200 | -0.63578900 |
| N | 3.14732700  | -0.63164300 | -0.42865100 |
| C | 3.58309000  | 0.54049900  | 0.22369700  |
| C | 2.47907900  | 1.36566400  | 0.69079300  |
| C | 1.20353500  | 0.97328300  | 0.48749900  |
| O | 1.60811500  | -2.14655100 | -1.17295700 |
| O | 4.77411400  | 0.77628200  | 0.34293300  |
| C | -2.61123500 | 1.95863800  | -0.81809100 |
| O | -1.85594000 | 2.42050200  | 0.30383300  |
| O | -3.33808600 | -1.57496600 | 0.06148900  |
| O | -1.40028100 | -1.60719200 | 1.85519800  |
| H | -1.14199700 | 0.43717700  | 1.56364800  |
| H | -3.20306600 | 0.09641600  | -1.68349500 |
| H | -2.23297900 | 2.38866200  | -1.75527200 |
| H | -3.67200800 | 2.23355500  | -0.71535900 |
| H | -3.05842300 | -2.18312100 | 0.76383400  |
| H | -0.47519700 | -1.70469700 | -0.50499500 |
| H | -0.49464200 | -1.80917100 | 2.12324300  |
| H | -3.46922100 | 0.25290000  | 1.05744100  |
| H | 3.87319000  | -1.24733600 | -0.77528600 |
| H | 2.71090900  | 2.30042000  | 1.18232800  |
| H | 0.35963500  | 1.59731400  | 0.75799200  |
| H | -1.87038100 | 3.38546400  | 0.30270500  |

O4'-C1'-N1-C6 dihedral = 90°

|   |             |             |             |
|---|-------------|-------------|-------------|
| C | -1.42691600 | -0.40697400 | 1.04124500  |
| C | -0.53673800 | -0.64372300 | -0.19528000 |
| O | -1.17041100 | -0.01884500 | -1.30142200 |
| C | -2.49623900 | 0.41107700  | -0.94079000 |
| C | -2.81613700 | -0.27638700 | 0.39506900  |
| N | 0.85801300  | -0.19726700 | -0.10785500 |
| C | 1.82575300  | -1.03840800 | -0.69725100 |
| N | 3.12918900  | -0.61848500 | -0.50283400 |
| C | 3.60289500  | 0.48663500  | 0.23296400  |
| C | 2.52596500  | 1.27484000  | 0.81275700  |
| C | 1.23906900  | 0.91311800  | 0.62263200  |
| O | 1.54537800  | -2.05122800 | -1.31234700 |
| O | 4.80001100  | 0.70239400  | 0.32715700  |



|   |             |             |             |
|---|-------------|-------------|-------------|
| C | -2.56857000 | 1.93171100  | -0.91464600 |
| O | -1.80582700 | 2.42628900  | 0.18765300  |
| O | -3.35591500 | -1.55341600 | 0.11545400  |
| O | -1.44693600 | -1.50354500 | 1.94199900  |
| H | -1.18941200 | 0.52522900  | 1.55905200  |
| H | -3.19276300 | 0.04543700  | -1.70370000 |
| H | -2.17663200 | 2.30845100  | -1.86888100 |
| H | -3.62322000 | 2.23605000  | -0.83037900 |
| H | -3.09643300 | -2.12717800 | 0.85331800  |
| H | -0.47684300 | -1.71866600 | -0.38215500 |
| H | -0.55273600 | -1.66743300 | 2.26773100  |
| H | -3.49600900 | 0.32130200  | 1.01819500  |
| H | 3.83375800  | -1.20886700 | -0.92848500 |
| H | 2.78507900  | 2.15998000  | 1.37710000  |
| H | 0.42011400  | 1.52299300  | 0.98135900  |
| H | -1.77021200 | 3.38844200  | 0.12352900  |

O4'-C1'-N1-C6 dihedral = 120°

|   |             |             |             |
|---|-------------|-------------|-------------|
| C | -1.38655400 | 0.92819700  | -0.66799900 |
| C | -0.48110100 | 0.39868000  | 0.45381200  |
| O | -1.09132800 | -0.79904400 | 0.89246500  |
| C | -2.50621400 | -0.75796600 | 0.60815400  |
| C | -2.76975700 | 0.58531600  | -0.09347700 |
| N | 0.91677000  | 0.11939900  | 0.09408000  |
| C | 1.77720900  | -0.12231300 | 1.18855700  |
| N | 3.10180600  | -0.31348000 | 0.83355100  |
| C | 3.70665600  | -0.16183600 | -0.42948200 |
| C | 2.75070400  | 0.20100800  | -1.46555500 |
| C | 1.43940000  | 0.32662800  | -1.16683900 |
| O | 1.38626000  | -0.15476600 | 2.33855900  |
| O | 4.90790800  | -0.32215500 | -0.56936900 |
| C | -2.88817400 | -1.98415700 | -0.20578800 |
| O | -2.35997300 | -1.85011600 | -1.52150300 |
| O | -3.15240600 | 1.53638800  | 0.88355200  |
| O | -1.31448100 | 2.32681600  | -0.88975000 |
| H | -1.25116300 | 0.34882100  | -1.58779000 |
| H | -3.05937900 | -0.77400500 | 1.55482300  |
| H | -2.48513400 | -2.87063600 | 0.30290200  |
| H | -3.98649700 | -2.06760200 | -0.22183300 |
| H | -2.90522200 | 2.40439600  | 0.52849200  |
| H | -0.45700100 | 1.12630100  | 1.27356300  |
| H | -0.40125700 | 2.58530800  | -1.06726900 |
| H | -3.52109700 | 0.49861700  | -0.88903800 |
| H | 3.72382700  | -0.51408000 | 1.60760500  |
| H | 3.11659300  | 0.35782700  | -2.47065400 |
| H | 0.71944900  | 0.57113700  | -1.93708600 |
| H | -2.48399600 | -2.68584200 | -1.98706800 |

O4'-C1'-N1-C6 dihedral = 140°

|   |             |             |             |
|---|-------------|-------------|-------------|
| C | 1.35564400  | 1.12164800  | 0.27834700  |
| C | 0.47162100  | 0.23201300  | -0.62013700 |
| O | 1.07364000  | -1.04757900 | -0.55555400 |
| C | 2.48027300  | -0.92215100 | -0.28359000 |
| C | 2.75113300  | 0.57898000  | -0.06106700 |
| N | -0.92728500 | 0.12708500  | -0.18193900 |
| C | -1.74234300 | -0.77233600 | -0.90331600 |
| N | -3.05467500 | -0.81125300 | -0.45992200 |
| C | -3.71026400 | 0.07296900  | 0.42071000  |
| C | -2.82239000 | 1.10117800  | 0.93839700  |
| C | -1.51145000 | 1.09943000  | 0.61212600  |
| O | -1.33460000 | -1.45537100 | -1.82238200 |
| O | -4.90102500 | -0.05649100 | 0.65779800  |
| C | 2.83775600  | -1.80519200 | 0.90424600  |
| O | 2.35532800  | -1.19514900 | 2.09498200  |
| O | 3.13723100  | 1.25304100  | -1.26202500 |
| O | 1.21535800  | 2.50580200  | 0.08350200  |
| H | 1.14385900  | 0.88889300  | 1.32505000  |
| H | 3.04284700  | -1.27168500 | -1.16086700 |
| H | 2.38631900  | -2.79195400 | 0.73796000  |
| H | 3.93250300  | -1.93252000 | 0.93847500  |
| H | 4.08512100  | 1.13962700  | -1.40019300 |
| H | 0.48016100  | 0.60012200  | -1.65588100 |
| H | 1.75040700  | 2.71933200  | -0.69822800 |
| H | 3.46624600  | 0.76529600  | 0.74634600  |
| H | -3.64319300 | -1.48208700 | -0.93898600 |
| H | -3.24045600 | 1.87006000  | 1.57300900  |
| H | -0.84539300 | 1.87825100  | 0.95858300  |
| H | 2.28796900  | -1.86742700 | 2.78289600  |

O4'-C1'-N1-C6 dihedral = 150°

|   |             |             |             |
|---|-------------|-------------|-------------|
| C | 1.36694000  | 1.11788900  | 0.29761100  |
| C | 0.49285300  | 0.26173200  | -0.64779600 |
| O | 1.10049900  | -1.01272300 | -0.66278400 |
| C | 2.48377900  | -0.92456000 | -0.27756900 |
| C | 2.76570100  | 0.56330400  | -0.00612900 |
| N | -0.90698000 | 0.13466100  | -0.19727200 |
| C | -1.71326200 | -0.82647000 | -0.84817500 |
| N | -3.02351100 | -0.84799100 | -0.39197000 |
| C | -3.69614500 | 0.11043600  | 0.39193900  |
| C | -2.82521700 | 1.19997000  | 0.80161700  |
| C | -1.51292700 | 1.18041900  | 0.48242700  |
| O | -1.31021500 | -1.57454000 | -1.71638300 |
| O | -4.88585800 | -0.01195400 | 0.63845500  |

|   |             |             |             |
|---|-------------|-------------|-------------|
| C | 2.73746600  | -1.84052700 | 0.91284500  |
| O | 2.18160800  | -1.25001900 | 2.08111200  |
| O | 3.20111000  | 1.26064000  | -1.17658800 |
| O | 1.25828300  | 2.50871900  | 0.12325500  |
| H | 1.11273500  | 0.87220700  | 1.33143100  |
| H | 3.09921800  | -1.27193400 | -1.11895600 |
| H | 2.28133900  | -2.81356200 | 0.68943200  |
| H | 3.82432400  | -1.99057200 | 1.02323400  |
| H | 4.14951300  | 1.12783400  | -1.29238100 |
| H | 0.49269900  | 0.68866400  | -1.66157900 |
| H | 1.82310800  | 2.72605500  | -0.63628200 |
| H | 3.45500900  | 0.72021400  | 0.82981600  |
| H | -3.60280700 | -1.56380000 | -0.81385300 |
| H | -3.25590800 | 2.02587200  | 1.35042700  |
| H | -0.85596400 | 1.99847200  | 0.74888300  |
| H | 2.03163000  | -1.94028500 | 2.73736500  |

O4'-C1'-N1-C6 dihedral = 180°

|   |             |             |             |
|---|-------------|-------------|-------------|
| C | -1.31875500 | -1.05129400 | 0.53356800  |
| C | -0.60573800 | -0.53818000 | -0.75544800 |
| O | -1.28083600 | 0.61305500  | -1.15146500 |
| C | -2.51314500 | 0.80146800  | -0.42005000 |
| C | -2.73975500 | -0.50473700 | 0.35202200  |
| N | 0.85674500  | -0.30246900 | -0.51067100 |
| C | 1.45458100  | 0.95615300  | -0.37613200 |
| N | 2.82411100  | 0.90000900  | -0.18065600 |
| C | 3.63377000  | -0.20992400 | 0.13929400  |
| C | 2.87028300  | -1.44532300 | 0.19110800  |
| C | 1.55628700  | -1.43580000 | -0.11370300 |
| O | 0.87851500  | 2.03804500  | -0.42169500 |
| O | 4.82575500  | -0.06823000 | 0.35486000  |
| C | -2.38473700 | 2.06161900  | 0.43853900  |
| O | -1.30737700 | 1.98083700  | 1.34564100  |
| O | -3.42079900 | -1.48776100 | -0.43550100 |
| O | -1.26282000 | -2.44589600 | 0.70977000  |
| H | -0.85821700 | -0.56600000 | 1.39738000  |
| H | -3.31449800 | 0.94057300  | -1.15784100 |
| H | -2.28365600 | 2.92424500  | -0.23485700 |
| H | -3.30748100 | 2.20059200  | 1.01666300  |
| H | -4.37024500 | -1.31968100 | -0.40481000 |
| H | -0.64352900 | -1.30558900 | -1.54141700 |
| H | -2.01745800 | -2.80045300 | 0.21012600  |
| H | -3.24617000 | -0.34560600 | 1.31048700  |
| H | 3.26967200  | 1.80796900  | -0.11862000 |
| H | 3.37466300  | -2.35652800 | 0.48117400  |
| H | 0.95533900  | -2.33783900 | -0.08129800 |
| H | -0.50065600 | 2.13123400  | 0.81424100  |

## 2'-exo-3'-endo ribosyl pucker

O4'-C1'-N1-C6 dihedral =  $-180^\circ$

|   |             |             |             |
|---|-------------|-------------|-------------|
| O | -1.29044900 | 0.37314500  | -1.27473800 |
| C | -0.51525300 | -0.73624700 | -0.94757800 |
| C | -1.32905900 | -1.51103100 | 0.11379700  |
| C | -2.10068700 | -0.38669600 | 0.82652400  |
| C | -2.37811400 | 0.58899300  | -0.32940100 |
| C | -2.44146400 | 2.06044300  | 0.06614000  |
| O | -1.33238000 | 2.47690400  | 0.82439700  |
| H | -0.72883900 | -2.11071900 | 0.79808400  |
| O | -2.23407900 | -2.42509200 | -0.50555700 |
| O | -3.25052600 | -0.84158900 | 1.49690700  |
| H | -3.32051500 | 0.31760800  | -0.82973000 |
| H | -2.57402400 | 2.66466000  | -0.84412600 |
| H | -3.33611400 | 2.19312200  | 0.68610300  |
| H | -0.55701900 | 2.45774300  | 0.23244000  |
| H | -1.45711900 | 0.11605900  | 1.55523800  |
| H | -3.56215300 | -1.61397700 | 0.99788200  |
| H | -0.36272800 | -1.34579700 | -1.84755600 |
| H | -2.64810600 | -1.98637800 | -1.26351100 |
| C | 1.44126200  | 0.87391100  | -0.42826300 |
| C | 1.64931000  | -1.51135100 | -0.11919100 |
| C | 3.60055200  | -0.16411500 | 0.38394600  |
| N | 0.87421800  | -0.40779600 | -0.44609900 |
| O | 4.74871400  | 0.04369700  | 0.73536400  |
| C | 2.93387800  | -1.45330800 | 0.28469100  |
| N | 2.75739300  | 0.89727100  | 0.00222100  |
| O | 0.87884700  | 1.91107100  | -0.75251000 |
| H | 3.16402600  | 1.82514400  | 0.03156800  |
| H | 1.14686100  | -2.46512100 | -0.23233300 |
| H | 3.49088000  | -2.34734600 | 0.52819600  |

O4'-C1'-N1-C6 dihedral =  $-140^\circ$

|   |             |             |             |
|---|-------------|-------------|-------------|
| O | -1.09252000 | -0.17367800 | 1.29246800  |
| C | -0.34167000 | 0.86016900  | 0.71549200  |
| C | -1.12044400 | 1.36371500  | -0.53290900 |
| C | -2.21677000 | 0.29699600  | -0.73966900 |
| C | -2.40442600 | -0.25835900 | 0.68538600  |
| C | -2.87943100 | -1.70383100 | 0.77598500  |
| O | -2.18343400 | -2.58217800 | -0.07588600 |
| H | -0.47320000 | 1.49429900  | -1.40157000 |
| O | -1.69639800 | 2.65212500  | -0.29936900 |
| O | -3.39880700 | 0.81205700  | -1.30728700 |

|   |             |             |             |
|---|-------------|-------------|-------------|
| H | -3.10834900 | 0.38325200  | 1.24246400  |
| H | -2.82102300 | -2.01467200 | 1.83212600  |
| H | -3.93428900 | -1.73150400 | 0.48059600  |
| H | -1.23374500 | -2.38777200 | -0.00658100 |
| H | -1.83960500 | -0.50898500 | -1.37274800 |
| H | -3.34699300 | 1.77706100  | -1.21590600 |
| H | -0.23376600 | 1.70284200  | 1.41337000  |
| H | -2.18085100 | 2.62939100  | 0.53941100  |
| C | 1.29902100  | -0.77221000 | -0.23508200 |
| C | 2.07600000  | 1.30874300  | 0.71520700  |
| C | 3.75064100  | -0.19368000 | -0.19774700 |
| N | 1.04636200  | 0.41635900  | 0.46340400  |
| O | 4.87521000  | -0.55287100 | -0.49755700 |
| C | 3.37005400  | 1.06533400  | 0.42576000  |
| N | 2.63776600  | -1.02514600 | -0.45320900 |
| O | 0.42644000  | -1.53090900 | -0.63331700 |
| H | 2.83042000  | -1.89555600 | -0.93546600 |
| H | 1.76553600  | 2.23228300  | 1.19132500  |
| H | 4.14518800  | 1.78323800  | 0.65465400  |

O4'-C1'-N1-C6 dihedral = -120°

|   |             |             |             |
|---|-------------|-------------|-------------|
| O | 0.99574200  | 0.11156500  | 1.30660400  |
| C | 0.33970700  | -0.93026600 | 0.61926700  |
| C | 1.19871200  | -1.31021600 | -0.61433200 |
| C | 2.29970800  | -0.22135600 | -0.64085000 |
| C | 2.33132800  | 0.29833800  | 0.80241500  |
| C | 2.69011900  | 1.77476900  | 0.94092500  |
| O | 2.02937200  | 2.60592300  | 0.01027800  |
| H | 0.59631600  | -1.32054900 | -1.53205500 |
| O | 1.76889200  | -2.58008800 | -0.37005900 |
| O | 3.57268500  | -0.77680900 | -0.97638600 |
| H | 3.03613300  | -0.31227300 | 1.38601900  |
| H | 2.48975000  | 2.07697800  | 1.98092800  |
| H | 3.76576400  | 1.88775100  | 0.76488300  |
| H | 1.09676000  | 2.33566600  | -0.03285400 |
| H | 2.02755600  | 0.59210500  | -1.31357600 |
| H | 3.75227200  | -0.58711200 | -1.90563400 |
| H | 0.26176200  | -1.82527600 | 1.24640200  |
| H | 2.70290400  | -2.49329200 | -0.63272900 |
| C | -1.28688100 | 0.60632400  | -0.44217800 |
| C | -2.09939800 | -1.26942000 | 0.84367100  |
| C | -3.75375400 | 0.20157500  | -0.15696100 |
| N | -1.04906700 | -0.52564900 | 0.33909800  |
| O | -4.87558600 | 0.59483300  | -0.42413300 |
| C | -3.39752400 | -0.96737300 | 0.63210700  |
| N | -2.61875700 | 0.90329000  | -0.62665000 |
| O | -0.39005400 | 1.28000400  | -0.93886200 |

|   |             |             |             |
|---|-------------|-------------|-------------|
| H | -2.80156000 | 1.72550100  | -1.19008700 |
| H | -1.80038600 | -2.12815300 | 1.43385000  |
| H | -4.19302300 | -1.57251400 | 1.04380000  |

O4'-C1'-N1-C6 dihedral =  $-100^\circ$

|   |             |             |             |
|---|-------------|-------------|-------------|
| O | 0.91465100  | 0.07674000  | 1.29713000  |
| C | 0.36017300  | -0.97991100 | 0.53878800  |
| C | 1.30615100  | -1.28186900 | -0.64703400 |
| C | 2.34873900  | -0.13703800 | -0.58245600 |
| C | 2.25854300  | 0.36651200  | 0.86576900  |
| C | 2.49606800  | 1.86444800  | 1.02996200  |
| O | 1.82524200  | 2.65072200  | 0.06551000  |
| H | 0.76531800  | -1.30101800 | -1.60050700 |
| O | 1.92755000  | -2.52664000 | -0.39184600 |
| O | 3.66967400  | -0.62017400 | -0.83491900 |
| H | 2.97425100  | -0.19463000 | 1.48418200  |
| H | 2.21534000  | 2.14463400  | 2.05721700  |
| H | 3.56732100  | 2.06239300  | 0.91287400  |
| H | 0.92426300  | 2.30493700  | -0.03910900 |
| H | 2.08088300  | 0.66818400  | -1.26600700 |
| H | 3.90052900  | -0.41050700 | -1.74845200 |
| H | 0.30592900  | -1.89576600 | 1.13751400  |
| H | 2.87125000  | -2.38355400 | -0.58582600 |
| C | -1.28654500 | 0.43438300  | -0.63215200 |
| C | -2.06034200 | -1.20952100 | 0.95411500  |
| C | -3.73482700 | 0.18521500  | -0.11971800 |
| N | -1.03527900 | -0.65185300 | 0.20987500  |
| O | -4.85861300 | 0.59455500  | -0.35120700 |
| C | -3.35610600 | -0.85864100 | 0.82024800  |
| N | -2.61862200 | 0.74376300  | -0.78664200 |
| O | -0.39463900 | 1.05678100  | -1.19945500 |
| H | -2.81215700 | 1.51537400  | -1.41444200 |
| H | -1.74438200 | -1.97956000 | 1.64868500  |
| H | -4.13327900 | -1.33120400 | 1.40439800  |

O4'-C1'-N1-C6 dihedral =  $-75^\circ$

|   |             |             |             |
|---|-------------|-------------|-------------|
| O | -0.90994100 | 0.37168200  | -1.23186500 |
| C | -0.39471700 | -0.86042500 | -0.72482300 |
| C | -1.38956200 | -1.38563900 | 0.32970900  |
| C | -2.27439800 | -0.15095300 | 0.60571500  |
| C | -2.24801100 | 0.58294300  | -0.73893800 |
| C | -2.48665900 | 2.08382400  | -0.66484600 |
| O | -1.57198300 | 2.72870900  | 0.20197800  |

|   |             |             |             |
|---|-------------|-------------|-------------|
| H | -0.89601800 | -1.77203100 | 1.22467600  |
| O | -2.16560400 | -2.38573000 | -0.31290300 |
| O | -3.61577800 | -0.52087100 | 0.91916400  |
| H | -2.97987300 | 0.11828900  | -1.41519200 |
| H | -2.44862800 | 2.50475100  | -1.68126000 |
| H | -3.49090800 | 2.25915900  | -0.26593600 |
| H | -0.68957200 | 2.46246800  | -0.09398500 |
| H | -1.82701700 | 0.47830300  | 1.37722000  |
| H | -3.70671300 | -0.54284500 | 1.88015100  |
| H | -0.36874200 | -1.59956900 | -1.53235600 |
| H | -3.06679000 | -2.26745000 | 0.03348400  |
| C | 1.34693000  | -0.16163500 | 0.92718100  |
| C | 1.92775000  | -0.58561500 | -1.37889700 |
| C | 3.69811300  | 0.18469700  | 0.09266500  |
| N | 1.00926300  | -0.66478600 | -0.34085200 |
| O | 4.83004300  | 0.52997900  | 0.38343200  |
| C | 3.21219000  | -0.20886600 | -1.22150700 |
| N | 2.68491900  | 0.14636900  | 1.07538900  |
| O | 0.54369900  | -0.02451200 | 1.83692400  |
| H | 2.94589500  | 0.47149600  | 1.99892500  |
| H | 1.53403900  | -0.88003900 | -2.34508700 |
| H | 3.90177000  | -0.18766000 | -2.05379100 |

O4'-C1'-N1-C6 dihedral = -50°

|   |             |             |             |
|---|-------------|-------------|-------------|
| O | 1.07883100  | 0.73017600  | 1.27039100  |
| C | 0.61445900  | -0.60245000 | 1.10014400  |
| C | 1.65186200  | -1.30753000 | 0.22113100  |
| C | 2.13675600  | -0.14982500 | -0.67009200 |
| C | 2.09210100  | 1.05014700  | 0.28731300  |
| C | 1.73216900  | 2.37499900  | -0.37336700 |
| O | 0.46573400  | 2.32835500  | -1.00926500 |
| H | 1.25186600  | -2.15419000 | -0.33573800 |
| O | 2.69858800  | -1.69402300 | 1.09912200  |
| O | 3.47956200  | -0.33724600 | -1.11021100 |
| H | 3.06088200  | 1.13447600  | 0.79547500  |
| H | 1.77925800  | 3.18133000  | 0.37315700  |
| H | 2.47348300  | 2.59367000  | -1.14894200 |
| H | -0.18711100 | 2.19289500  | -0.30834200 |
| H | 1.44947000  | 0.00103200  | -1.50742400 |
| H | 3.45740700  | -0.83399000 | -1.93871600 |
| H | 0.59543100  | -1.07380100 | 2.08674400  |
| H | 3.51786200  | -1.54999600 | 0.59690700  |
| C | -1.25666600 | -1.00963800 | -0.60811000 |
| C | -1.62265700 | 0.26154600  | 1.41367200  |
| C | -3.49242900 | 0.05678400  | -0.12053400 |
| N | -0.80681100 | -0.55667100 | 0.64266800  |
| O | -4.62964100 | 0.24226800  | -0.51827200 |

|   |             |             |             |
|---|-------------|-------------|-------------|
| C | -2.89733800 | 0.57320100  | 1.10327900  |
| N | -2.58578200 | -0.72207200 | -0.86638100 |
| O | -0.57151900 | -1.61786500 | -1.41600200 |
| H | -2.92164600 | -1.06832400 | -1.75735300 |
| H | -1.15085200 | 0.63402600  | 2.31493200  |
| H | -3.49988200 | 1.19734800  | 1.74856800  |

O4'-C1'-N1-C6 dihedral = -30°

|   |             |             |             |
|---|-------------|-------------|-------------|
| O | 1.17237700  | 0.62141500  | 1.21634900  |
| C | 0.47734700  | -0.58425900 | 0.94547500  |
| C | 1.37439700  | -1.37802300 | -0.02254400 |
| C | 2.17263200  | -0.26350400 | -0.72076200 |
| C | 2.36036900  | 0.75245400  | 0.40387600  |
| C | 2.50001100  | 2.19881600  | -0.04934500 |
| O | 1.45956600  | 2.61197800  | -0.92004100 |
| H | 0.80357200  | -2.00938600 | -0.70462100 |
| O | 2.25026400  | -2.14317800 | 0.78734800  |
| O | 3.44793800  | -0.71484500 | -1.16771700 |
| H | 3.23490600  | 0.46776700  | 1.00292400  |
| H | 2.57459200  | 2.85064500  | 0.83326400  |
| H | 3.43440600  | 2.28997800  | -0.61221200 |
| H | 0.63448800  | 2.58394000  | -0.41736900 |
| H | 1.59523600  | 0.19154800  | -1.53297200 |
| H | 3.35720900  | -1.03854700 | -2.07318700 |
| H | 0.32921700  | -1.14254400 | 1.87439000  |
| H | 3.09070900  | -2.17498400 | 0.30141700  |
| C | -1.68530600 | -1.22578000 | -0.15363400 |
| C | -1.43927000 | 0.97898300  | 0.79113300  |
| C | -3.57695900 | 0.43766300  | -0.23204000 |
| N | -0.86606200 | -0.21607200 | 0.38355300  |
| O | -4.72867600 | 0.64212300  | -0.57663000 |
| C | -2.70675500 | 1.34295600  | 0.50195200  |
| N | -2.94979100 | -0.79410700 | -0.51298000 |
| O | -1.32552300 | -2.38113100 | -0.31286100 |
| H | -3.53181500 | -1.50538100 | -0.93949100 |
| H | -0.77149200 | 1.61632500  | 1.35507300  |
| H | -3.10642200 | 2.29515700  | 0.82251100  |

O4'-C1'-N1-C6 dihedral = -20°

|   |             |             |             |
|---|-------------|-------------|-------------|
| O | -1.16976700 | 0.56425500  | -1.21932100 |
| C | -0.44207000 | -0.60848500 | -0.89775900 |
| C | -1.29754000 | -1.38237800 | 0.12430700  |
| C | -2.16832600 | -0.27063800 | 0.73684200  |



|   |             |             |             |
|---|-------------|-------------|-------------|
| C | -2.39430600 | 0.65405700  | -0.45724400 |
| C | -2.66345200 | 2.10965200  | -0.10438800 |
| O | -1.70652500 | 2.65468000  | 0.79027100  |
| H | -0.68752600 | -1.92029100 | 0.85390500  |
| O | -2.11925800 | -2.26347400 | -0.61806000 |
| O | -3.42224000 | -0.76232800 | 1.20090900  |
| H | -3.22315300 | 0.26370700  | -1.06203300 |
| H | -2.73943300 | 2.70051500  | -1.02854500 |
| H | -3.63054900 | 2.16009500  | 0.40561700  |
| H | -0.85880700 | 2.68291400  | 0.32788500  |
| H | -1.63072000 | 0.27352200  | 1.52099300  |
| H | -3.33240500 | -0.99941200 | 2.13279600  |
| H | -0.28593900 | -1.21572600 | -1.79401800 |
| H | -2.95884900 | -2.30818500 | -0.13147500 |
| C | 1.76796100  | -1.21356700 | 0.04933600  |
| C | 1.38958800  | 1.06919600  | -0.63556800 |
| C | 3.58115900  | 0.52026800  | 0.26608200  |
| N | 0.89556500  | -0.19382400 | -0.36546300 |
| O | 4.73202700  | 0.74213200  | 0.60338400  |
| C | 2.64641700  | 1.46042600  | -0.33231500 |
| N | 3.02452400  | -0.76803100 | 0.41604600  |
| O | 1.44473000  | -2.38960500 | 0.09687800  |
| H | 3.65096500  | -1.49101700 | 0.74968700  |
| H | 0.67668800  | 1.72716900  | -1.11299600 |
| H | 2.99079200  | 2.46321500  | -0.54414500 |

O4'-C1'-N1-C6 dihedral = 0°

|   |             |             |             |
|---|-------------|-------------|-------------|
| O | -1.18288500 | 0.41967100  | -1.25005900 |
| C | -0.41012900 | -0.68814000 | -0.82880700 |
| C | -1.21997900 | -1.39931300 | 0.27078300  |
| C | -2.11367900 | -0.25700900 | 0.79332800  |
| C | -2.40743100 | 0.50781900  | -0.49774700 |
| C | -2.81710600 | 1.96171800  | -0.32698100 |
| O | -1.86671400 | 2.72120400  | 0.41397400  |
| H | -0.56685700 | -1.83992100 | 1.03241000  |
| O | -2.02809000 | -2.37744400 | -0.35079300 |
| O | -3.33459800 | -0.73253300 | 1.35086800  |
| H | -3.20696000 | -0.01955000 | -1.03661900 |
| H | -3.00686700 | 2.40620200  | -1.31163500 |
| H | -3.76200700 | 1.97154700  | 0.22908300  |
| H | -1.33084300 | 3.22188500  | -0.21118700 |
| H | -1.57213600 | 0.38989000  | 1.49282800  |
| H | -3.20467000 | -0.87669900 | 2.29697800  |
| H | -0.21667200 | -1.36906900 | -1.66085200 |
| H | -2.85101100 | -2.40445100 | 0.16468600  |
| C | 1.87665300  | -1.19679600 | -0.12320500 |
| C | 1.24553200  | 1.13171000  | -0.29932500 |

|   |            |             |             |
|---|------------|-------------|-------------|
| C | 3.55275200 | 0.63217600  | 0.29634700  |
| N | 0.90830000 | -0.20368300 | -0.32134500 |
| O | 4.70874700 | 0.89562300  | 0.58551500  |
| C | 2.48572800 | 1.57545400  | 0.00483600  |
| N | 3.12608300 | -0.71194800 | 0.21109200  |
| O | 1.62323400 | -2.38666100 | -0.23130200 |
| H | 3.83331300 | -1.41913300 | 0.37174400  |
| H | 0.41841300 | 1.79233600  | -0.51196500 |
| H | 2.71400500 | 2.63177600  | 0.03530300  |

O4'-C1'-N1-C6 dihedral = 20°

|   |             |             |             |
|---|-------------|-------------|-------------|
| O | -1.17608000 | 0.32266100  | -1.24231800 |
| C | -0.39377400 | -0.74931000 | -0.74049300 |
| C | -1.18815900 | -1.37412900 | 0.42402500  |
| C | -2.12606200 | -0.21715800 | 0.82995100  |
| C | -2.42298900 | 0.41281500  | -0.53239900 |
| C | -2.90139600 | 1.85685100  | -0.51375700 |
| O | -1.95672700 | 2.75434700  | 0.06178600  |
| H | -0.52010400 | -1.70850500 | 1.22865500  |
| O | -1.95858100 | -2.43969400 | -0.08937100 |
| O | -3.33966100 | -0.67897700 | 1.41348700  |
| H | -3.18502100 | -0.20205800 | -1.03235600 |
| H | -3.17178100 | 2.16701400  | -1.53095400 |
| H | -3.80860500 | 1.89917200  | 0.09869900  |
| H | -1.36940200 | 3.04280500  | -0.64765700 |
| H | -1.61933900 | 0.50947400  | 1.47585200  |
| H | -3.22319800 | -0.72734200 | 2.37106400  |
| H | -0.20651700 | -1.50041200 | -1.50959400 |
| H | -2.78729200 | -2.43472900 | 0.41786900  |
| C | 1.97165900  | -1.16701600 | -0.29134300 |
| C | 1.15225200  | 1.09894200  | -0.03039900 |
| C | 3.52605100  | 0.70687300  | 0.34605300  |
| N | 0.92917400  | -0.23083600 | -0.31128300 |
| O | 4.67383100  | 1.01748300  | 0.62083100  |
| C | 2.36989900  | 1.58766900  | 0.29551400  |
| N | 3.20302800  | -0.63265700 | 0.03619000  |
| O | 1.79385000  | -2.34949600 | -0.53668200 |
| H | 3.96812400  | -1.29615800 | 0.05780400  |
| H | 0.26590000  | 1.71653600  | -0.07119400 |
| H | 2.51387500  | 2.63484600  | 0.52267900  |

O4'-C1'-N1-C6 dihedral = 40°

|   |             |            |             |
|---|-------------|------------|-------------|
| O | -1.14520800 | 0.20957200 | -1.23442200 |
|---|-------------|------------|-------------|

|   |             |             |             |
|---|-------------|-------------|-------------|
| C | -0.38940300 | -0.81854300 | -0.59927200 |
| C | -1.22096900 | -1.29673700 | 0.61309200  |
| C | -2.20992800 | -0.13075700 | 0.82796500  |
| C | -2.42781100 | 0.35552600  | -0.60733500 |
| C | -2.87771500 | 1.80368700  | -0.74739400 |
| O | -1.91152300 | 2.72306500  | -0.25196500 |
| H | -0.57861000 | -1.49427900 | 1.48302300  |
| O | -1.93599400 | -2.45041200 | 0.22533000  |
| O | -3.45046800 | -0.56480500 | 1.37619900  |
| H | -3.16642200 | -0.30402200 | -1.08513000 |
| H | -3.12207300 | 2.01544200  | -1.79675700 |
| H | -3.78885000 | 1.94070300  | -0.15648100 |
| H | -1.19637500 | 2.74137300  | -0.90209600 |
| H | -1.76812100 | 0.67073600  | 1.43066100  |
| H | -3.40198600 | -0.50280300 | 2.33887900  |
| H | -0.21016700 | -1.65784400 | -1.27184000 |
| H | -2.80037000 | -2.38585000 | 0.66528000  |
| C | 2.04224100  | -1.12749200 | -0.45928000 |
| C | 1.09482400  | 0.99096800  | 0.25356300  |
| C | 3.50856000  | 0.72635800  | 0.41266800  |
| N | 0.93728700  | -0.28664400 | -0.24348300 |
| O | 4.64890000  | 1.07430500  | 0.67150800  |
| C | 2.29604200  | 1.51280900  | 0.58450800  |
| N | 3.25375600  | -0.55768200 | -0.11392100 |
| O | 1.94112100  | -2.25842500 | -0.90343400 |
| H | 4.06169100  | -1.15105000 | -0.25984600 |
| H | 0.17722500  | 1.55845200  | 0.34741400  |
| H | 2.38708500  | 2.51810800  | 0.97189900  |

O4'-C1'-N1-C6 dihedral = 47°

|   |             |             |             |
|---|-------------|-------------|-------------|
| O | -1.15619200 | 0.16869200  | -1.24626800 |
| C | -0.40696900 | -0.82642300 | -0.55442300 |
| C | -1.25419400 | -1.25195800 | 0.66713500  |
| C | -2.24620700 | -0.08282400 | 0.84147300  |
| C | -2.43458600 | 0.38160500  | -0.61441800 |
| C | -2.82181700 | 1.84562300  | -0.78644200 |
| O | -1.80274800 | 2.72492000  | -0.32946300 |
| H | -0.64036000 | -1.44013500 | 1.54958800  |
| O | -1.98044200 | -2.45991800 | 0.43154300  |
| O | -3.44094500 | -0.45151400 | 1.48069100  |
| H | -3.20385400 | -0.24786100 | -1.09108000 |
| H | -3.07406500 | 2.04696000  | -1.83646400 |
| H | -3.71356100 | 2.03802100  | -0.18182100 |
| H | -1.08697100 | 2.66858400  | -0.97699900 |
| H | -1.79096400 | 0.72822000  | 1.42002600  |
| H | -3.54574800 | -1.40202300 | 1.30416100  |
| H | -0.20846500 | -1.68792300 | -1.19760500 |

|   |             |             |             |
|---|-------------|-------------|-------------|
| H | -2.22407300 | -2.51234600 | -0.50319500 |
| C | 2.02772000  | -1.11507900 | -0.50800100 |
| C | 1.07711300  | 0.95517600  | 0.34409000  |
| C | 3.49646700  | 0.70331300  | 0.42865200  |
| N | 0.92046200  | -0.29803900 | -0.21826100 |
| O | 4.63936600  | 1.04688800  | 0.67750700  |
| C | 2.28185600  | 1.46852600  | 0.67188600  |
| N | 3.24049200  | -0.55334900 | -0.16313100 |
| O | 1.92354400  | -2.22122600 | -1.01244800 |
| H | 4.05066200  | -1.12897800 | -0.35965000 |
| H | 0.15892600  | 1.51376900  | 0.48135200  |
| H | 2.37484200  | 2.45294200  | 1.10923200  |

O4'-C1'-N1-C6 dihedral = 60°

|   |             |             |             |
|---|-------------|-------------|-------------|
| O | -1.10629500 | 0.11594700  | -1.22926000 |
| C | -0.39076100 | -0.85415500 | -0.45900600 |
| C | -1.26379800 | -1.18400800 | 0.77514600  |
| C | -2.31070200 | -0.04665600 | 0.78570000  |
| C | -2.42248600 | 0.31729000  | -0.69847500 |
| C | -2.81343900 | 1.76650400  | -0.96329000 |
| O | -1.85730000 | 2.67062600  | -0.42695800 |
| H | -0.65865600 | -1.22437800 | 1.69269200  |
| O | -1.90692700 | -2.41685600 | 0.53432900  |
| O | -3.57854800 | -0.48396100 | 1.26645200  |
| H | -3.14324400 | -0.36346900 | -1.17395700 |
| H | -2.94818300 | 1.92206400  | -2.04247000 |
| H | -3.76852800 | 1.97297000  | -0.47026600 |
| H | -1.04388800 | 2.52202800  | -0.92962900 |
| H | -1.95658400 | 0.82337500  | 1.34903500  |
| H | -3.62787800 | -0.30953500 | 2.21517000  |
| H | -0.22602200 | -1.76404700 | -1.03652500 |
| H | -2.81132200 | -2.31388400 | 0.87666900  |
| C | 2.05586800  | -1.05193900 | -0.62349600 |
| C | 1.09609700  | 0.84678200  | 0.55023200  |
| C | 3.52043600  | 0.68435900  | 0.46914200  |
| N | 0.94063700  | -0.32657900 | -0.16200800 |
| O | 4.66393900  | 1.03945500  | 0.70072800  |
| C | 2.29870100  | 1.36437500  | 0.87789600  |
| N | 3.26936700  | -0.48953400 | -0.27043700 |
| O | 1.96669700  | -2.08172000 | -1.26756300 |
| H | 4.08393300  | -0.99962600 | -0.59058500 |
| H | 0.17225600  | 1.35507000  | 0.80061700  |
| H | 2.38606500  | 2.28897800  | 1.43143600  |

O4'-C1'-N1-C6 dihedral = 80°

|   |             |             |             |
|---|-------------|-------------|-------------|
| O | 1.06757000  | 0.09824700  | 1.19543100  |
| C | 0.38464400  | -0.85862700 | 0.37412400  |
| C | 1.29287100  | -1.13731500 | -0.84514100 |
| C | 2.34239400  | -0.00374600 | -0.77074100 |
| C | 2.40989800  | 0.28993500  | 0.73123900  |
| C | 2.81497100  | 1.71844000  | 1.07452400  |
| O | 1.91656800  | 2.65996100  | 0.50994500  |
| H | 0.72519300  | -1.14202700 | -1.78716000 |
| O | 1.92476400  | -2.38215700 | -0.63656900 |
| O | 3.61942000  | -0.42356300 | -1.24031300 |
| H | 3.09574300  | -0.42778300 | 1.20417100  |
| H | 2.88022200  | 1.82713300  | 2.16647800  |
| H | 3.80520000  | 1.91981800  | 0.65409600  |
| H | 1.04931800  | 2.45022100  | 0.88639500  |
| H | 2.00399000  | 0.89935300  | -1.29153100 |
| H | 3.70132000  | -0.18852200 | -2.17342700 |
| H | 0.23520900  | -1.78365700 | 0.93116500  |
| H | 2.83839600  | -2.26806500 | -0.95018000 |
| C | -2.02409100 | -0.87593500 | 0.82842400  |
| C | -1.16885800 | 0.58811300  | -0.91078900 |
| C | -3.56791700 | 0.58953600  | -0.52126700 |
| N | -0.95148800 | -0.35338900 | 0.07639000  |
| O | -4.72167000 | 0.93428000  | -0.71276600 |
| C | -2.38908300 | 1.06495400  | -1.23322100 |
| N | -3.25721200 | -0.35910000 | 0.47420900  |
| O | -1.88227500 | -1.70891500 | 1.70417000  |
| H | -4.03977800 | -0.72513400 | 1.00330100  |
| H | -0.27629800 | 0.94666600  | -1.40902900 |
| H | -2.52159900 | 1.80447500  | -2.01056900 |

O4'-C1'-N1-C6 dihedral = 100°

|   |            |             |             |
|---|------------|-------------|-------------|
| O | 1.09047900 | 0.10205900  | 1.23061900  |
| C | 0.43270000 | -0.88860800 | 0.43479300  |
| C | 1.38523400 | -1.23185700 | -0.72427000 |
| C | 2.31065100 | 0.00255300  | -0.78370300 |
| C | 2.37632400 | 0.43418900  | 0.68563800  |
| C | 2.59176800 | 1.92937900  | 0.88747600  |
| O | 1.55637000 | 2.68411200  | 0.28005300  |
| H | 0.85612300 | -1.43193700 | -1.66654400 |
| O | 2.13542900 | -2.36189100 | -0.33053900 |
| O | 3.61625800 | -0.32892300 | -1.24473800 |
| H | 3.16637200 | -0.13953400 | 1.18972900  |
| H | 2.67108100 | 2.14369200  | 1.96284900  |
| H | 3.53293000 | 2.22459000  | 0.41278200  |
| H | 0.73597700 | 2.37722900  | 0.69406000  |
| H | 1.86884600 | 0.81402300  | -1.37416400 |
| H | 3.65318900 | -0.19527400 | -2.20052400 |

|   |             |             |             |
|---|-------------|-------------|-------------|
| H | 0.26610600  | -1.77284700 | 1.04972200  |
| H | 3.03439500  | -2.20879800 | -0.66838200 |
| C | -1.91963800 | -0.62339900 | 1.01449200  |
| C | -1.20032600 | 0.15327600  | -1.16848000 |
| C | -3.55668200 | 0.38784200  | -0.61121000 |
| N | -0.90139600 | -0.39863000 | 0.06233700  |
| O | -4.71770300 | 0.70080000  | -0.81346900 |
| C | -2.44001300 | 0.54374800  | -1.53273900 |
| N | -3.17063300 | -0.18955300 | 0.61521500  |
| O | -1.71343000 | -1.15389800 | 2.08965200  |
| H | -3.90884600 | -0.33845900 | 1.29291100  |
| H | -0.35947900 | 0.28350500  | -1.83695800 |
| H | -2.63182300 | 0.98028000  | -2.50294800 |

O4'-C1'-N1-C6 dihedral = 120°

|   |             |             |             |
|---|-------------|-------------|-------------|
| O | 1.12315000  | 0.56876400  | 1.12463900  |
| C | 0.48021600  | -0.65803400 | 0.79479700  |
| C | 1.46195200  | -1.43384500 | -0.09582200 |
| C | 2.27853600  | -0.30070500 | -0.74850900 |
| C | 2.33781000  | 0.74230000  | 0.37332200  |
| C | 2.39091300  | 2.18426400  | -0.11671000 |
| O | 1.26810800  | 2.49947500  | -0.92254900 |
| H | 0.97275000  | -2.09935800 | -0.81899600 |
| O | 2.29650600  | -2.18162000 | 0.76426100  |
| O | 3.59931600  | -0.71647300 | -1.08052200 |
| H | 3.20398700  | 0.52547800  | 1.01278400  |
| H | 2.47090400  | 2.85845800  | 0.74796700  |
| H | 3.28399000  | 2.32019000  | -0.73536200 |
| H | 0.49350400  | 2.35360500  | -0.35954900 |
| H | 1.75651400  | 0.12511500  | -1.61367600 |
| H | 3.60655100  | -1.03473400 | -1.99236200 |
| H | 0.29897600  | -1.20157700 | 1.72291700  |
| H | 3.18189600  | -2.14500700 | 0.36414200  |
| C | -1.80599800 | 0.08187700  | 1.15122900  |
| C | -1.25345600 | -0.73345000 | -1.06018300 |
| C | -3.55210800 | -0.04091300 | -0.65863700 |
| N | -0.85026700 | -0.36480400 | 0.20967900  |
| O | -4.72054500 | 0.14818800  | -0.95191400 |
| C | -2.51472800 | -0.58891600 | -1.51975100 |
| N | -3.07306400 | 0.27234200  | 0.62916800  |
| O | -1.53243600 | 0.28321000  | 2.31880300  |
| H | -3.75922100 | 0.61129900  | 1.29311500  |
| H | -0.47737000 | -1.12237000 | -1.70437400 |
| H | -2.78077200 | -0.87168700 | -2.52869100 |

O4'-C1'-N1-C6 dihedral = 145°

|   |             |             |             |
|---|-------------|-------------|-------------|
| O | 1.09606100  | 0.18097300  | 1.30328100  |
| C | 0.33281000  | -0.86040100 | 0.75016800  |
| C | 1.07687500  | -1.37278300 | -0.51238200 |
| C | 2.19322100  | -0.32154000 | -0.71721600 |
| C | 2.39802200  | 0.24148900  | 0.69278200  |
| C | 2.89067200  | 1.68342600  | 0.75017600  |
| O | 2.21631300  | 2.54544100  | -0.13847500 |
| H | 0.39665000  | -1.44554300 | -1.37310700 |
| O | 1.64189600  | -2.63057000 | -0.20633700 |
| O | 3.40042500  | -0.92775300 | -1.17742300 |
| H | 3.09536000  | -0.41032000 | 1.24007200  |
| H | 2.82031200  | 2.02436800  | 1.79533300  |
| H | 3.95008800  | 1.69437900  | 0.47013900  |
| H | 1.26129400  | 2.38498800  | -0.04700900 |
| H | 1.86470100  | 0.48108500  | -1.37998700 |
| H | 3.47810500  | -0.77410600 | -2.12709500 |
| H | 0.24326100  | -1.69860700 | 1.45088100  |
| H | 2.53459400  | -2.60976400 | -0.59497500 |
| C | -1.29916200 | 0.78990500  | -0.18691400 |
| C | -2.07726300 | -1.31538600 | 0.69115000  |
| C | -3.74639000 | 0.19585200  | -0.21515300 |
| N | -1.05451600 | -0.39890800 | 0.51062800  |
| O | -4.86670600 | 0.55472100  | -0.53303800 |
| C | -3.36663700 | -1.07923300 | 0.37316600  |
| N | -2.63588300 | 1.04536000  | -0.41711200 |
| O | -0.42523900 | 1.55307300  | -0.57865600 |
| H | -2.82385500 | 1.92109200  | -0.89114900 |
| H | -1.76564400 | -2.25125300 | 1.14190200  |
| H | -4.13696700 | -1.81653700 | 0.55090000  |

O4'-C1'-N1-C6 dihedral = 170°

|   |             |             |             |
|---|-------------|-------------|-------------|
| O | -1.28810900 | 0.46748800  | -1.23269800 |
| C | -0.54590300 | -0.69117700 | -1.03134100 |
| C | -1.32283600 | -1.50663300 | 0.03567100  |
| C | -2.07710600 | -0.40343500 | 0.80550100  |
| C | -2.36076900 | 0.62715000  | -0.28469000 |
| C | -2.38111000 | 2.07550600  | 0.19334400  |
| O | -1.20541500 | 2.42891500  | 0.88599100  |
| H | -0.67156400 | -2.09169100 | 0.69705200  |
| O | -2.23724800 | -2.33978900 | -0.64042400 |
| O | -3.30526400 | -0.88747700 | 1.34280300  |
| H | -3.31083000 | 0.37987700  | -0.77770900 |

|   |             |             |             |
|---|-------------|-------------|-------------|
| H | -2.56297000 | 2.72893900  | -0.67237800 |
| H | -3.22522300 | 2.19547200  | 0.88284800  |
| H | -0.48021500 | 2.42892400  | 0.23245300  |
| H | -1.44254000 | 0.04782200  | 1.57565700  |
| H | -3.15178600 | -1.17713700 | 2.25120000  |
| H | -0.46759100 | -1.25164500 | -1.96884200 |
| H | -3.05223900 | -2.31354800 | -0.10964400 |
| C | 1.46247700  | 0.85685100  | -0.52211000 |
| C | 1.60009600  | -1.52159900 | -0.15050000 |
| C | 3.54776600  | -0.20517400 | 0.44219300  |
| N | 0.87774600  | -0.41692600 | -0.57434900 |
| O | 4.67540700  | -0.01070300 | 0.86361700  |
| C | 2.85804300  | -1.47988700 | 0.33522500  |
| N | 2.75582600  | 0.86120900  | -0.02365900 |
| O | 0.93536400  | 1.90422500  | -0.87318100 |
| H | 3.17681000  | 1.78219800  | 0.01480400  |
| H | 1.09481800  | -2.47031800 | -0.28374900 |
| H | 3.37649100  | -2.37977100 | 0.63573600  |

O4'-C1'-N1-C6 dihedral = 180°

|   |             |             |             |
|---|-------------|-------------|-------------|
| O | -1.29044900 | 0.37314500  | -1.27473800 |
| C | -0.51525300 | -0.73624700 | -0.94757800 |
| C | -1.32905900 | -1.51103100 | 0.11379700  |
| C | -2.10068700 | -0.38669600 | 0.82652400  |
| C | -2.37811400 | 0.58899300  | -0.32940100 |
| C | -2.44146400 | 2.06044300  | 0.06614000  |
| O | -1.33238000 | 2.47690400  | 0.82439700  |
| H | -0.72883900 | -2.11071900 | 0.79808400  |
| O | -2.23407900 | -2.42509200 | -0.50555700 |
| O | -3.25052600 | -0.84158900 | 1.49690700  |
| H | -3.32051500 | 0.31760800  | -0.82973000 |
| H | -2.57402400 | 2.66466000  | -0.84412600 |
| H | -3.33611400 | 2.19312200  | 0.68610300  |
| H | -0.55701900 | 2.45774300  | 0.23244000  |
| H | -1.45711900 | 0.11605900  | 1.55523800  |
| H | -3.56215300 | -1.61397700 | 0.99788200  |
| H | -0.36272800 | -1.34579700 | -1.84755600 |
| H | -2.64810600 | -1.98637800 | -1.26351100 |
| C | 1.44126200  | 0.87391100  | -0.42826300 |
| C | 1.64931000  | -1.51135100 | -0.11919100 |
| C | 3.60055200  | -0.16411500 | 0.38394600  |
| N | 0.87421800  | -0.40779600 | -0.44609900 |
| O | 4.74871400  | 0.04369700  | 0.73536400  |
| C | 2.93387800  | -1.45330800 | 0.28469100  |
| N | 2.75739300  | 0.89727100  | 0.00222100  |
| O | 0.87884700  | 1.91107100  | -0.75251000 |



|   |            |             |             |
|---|------------|-------------|-------------|
| H | 3.16402600 | 1.82514400  | 0.03156800  |
| H | 1.14686100 | -2.46512100 | -0.23233300 |
| H | 3.49088000 | -2.34734600 | 0.52819600  |

## REFERENCES

- (1) Singh, V.; Lee, J. E.; Nunez, S.; Howell, P. L.; and Schramm, V. L. (2005) Transition state structure of 5'-methylthioadenosine/S-adenosylhomocysteine nucleosidase from *Escherichia coli* and its similarity to transition state analogues. *Biochemistry* 44, 11647–11659.
- (2) Silva, R. G.; Veticatt, M. J.; Merino, E. F.; Cassera, M. B.; and Schramm, V. L. (2011) Transition-state analysis of *Trypanosoma cruzi* uridine phosphorylase-catalyzed arsenolysis of uridine. *J. Am. Chem. Soc.* 133, 9923–9931.
- (3) Murkin, A. S.; Tyler, P. C.; Schramm, V. L. (2008) Transition-state interactions revealed in purine nucleoside phosphorylase by binding isotope effects. *J. Am. Chem. Soc.* 130, 2166-2167.
- (4) Parkin, D. W.; Leung, H. B.; and Schramm, V. L. (1984) Synthesis of nucleotides with specific radiolabels in ribose. Primary  $^{14}\text{C}$  and secondary  $^3\text{H}$  kinetic isotope effects on acid-catalyzed glycosidic bond hydrolysis of AMP, dAMP, and inosine. *J. Biol. Chem.* 259, 9411–9417.
- (5) Frisch, M. J.; *et al.* (2009) Gaussian 09, Revision A.02, Gaussian, Inc., Wallington, CT.
- (6) Anisimov, V.; Paneth, P. (1999) ISOEFF98. A program for studies of isotope effects using Hessian modifications. *J. Math. Chem.* 26, 75-86.
